# Supplementary material for: The effect of double-chain surfactants on armored bubbles: a surfactant-controlled route to colloidosomes
Source: Royal Society of Chemistry journal article supplement (doi:10.1039/b712172e), 2007-01-01
Supplement: b712172e.pdf [file b712172e.pdf]

# The effect of double-chain surfactants on armored bubbles: A surfactant-controlled route to colloidosomes

Anand Bala Subramaniam,<sup>a</sup> Donald Gregory,<sup>b</sup> Jordan Petkov,<sup>b</sup> and Howard A. Stone<sup>a\*</sup>

<sup>a</sup> *School of Engineering and Applied Sciences,  
Harvard University, Pierce Hall, 29 Oxford Street,  
Cambridge, Massachusetts 02138, USA*

<sup>b</sup> *Unilever Research and Development, Port Sunlight, Wirral, UK*

---

\*E-mail: has@seas.harvard.edu

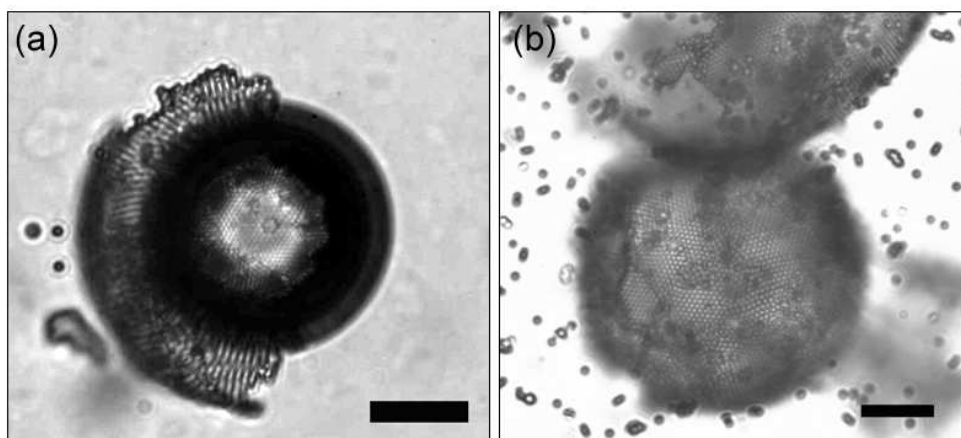

FIG. 1: Structures obtained after bubbles covered with  $1.5 \mu m$  diameter cationic amidine polystyrene particles were exposed to the cationic double-chain surfactant dioctyldimethylammonium bromide( $n=8$ ). (a) An intermediate stage of colloidosome formation, with a fragment of the colloidosome still adhering to the air bubble. Scale bar  $25 \mu m$ . (b) Intact colloidosome next to a broken colloidosome fragment. Scale bar  $20 \mu m$
